# Supplementary material for: Cross-genotype protection of live-attenuated vaccine candidate for severe fever with thrombocytopenia syndrome virus in a ferret model
Source: PubMed Central journal article supplement (PMC6936527; doi:10.1073/pnas.1914704116), 2019-12-09
Supplement: pnas.1914704116.sapp.pdf [file pnas.1914704116.sapp.pdf]

# PNAS

[www.pnas.org](http://www.pnas.org)

Supplementary Information for

**Cross-genotype protection of live-attenuated vaccine candidate for severe fever with thrombocytopenia syndrome virus in a ferret model.**

Kwang-Min Yu<sup>1</sup>, Su-Jin Park<sup>1</sup>, Min-Ah Yu<sup>1</sup>, Young-Il Kim<sup>1</sup>, Younho Choi<sup>2</sup>, Jae U. Jung<sup>2</sup>, Benjamin Brennan<sup>3\*</sup> & Young Ki Choi<sup>1\*</sup>

Young Ki Choi  
Email: [choiki55@chungbuk.ac.kr](mailto:choiki55@chungbuk.ac.kr)

Benjamin Brennan  
Email: [ben.brennan@glasgow.ac.uk](mailto:ben.brennan@glasgow.ac.uk)

**This PDF file includes:**

Figures S1 to S2  
Tables S1

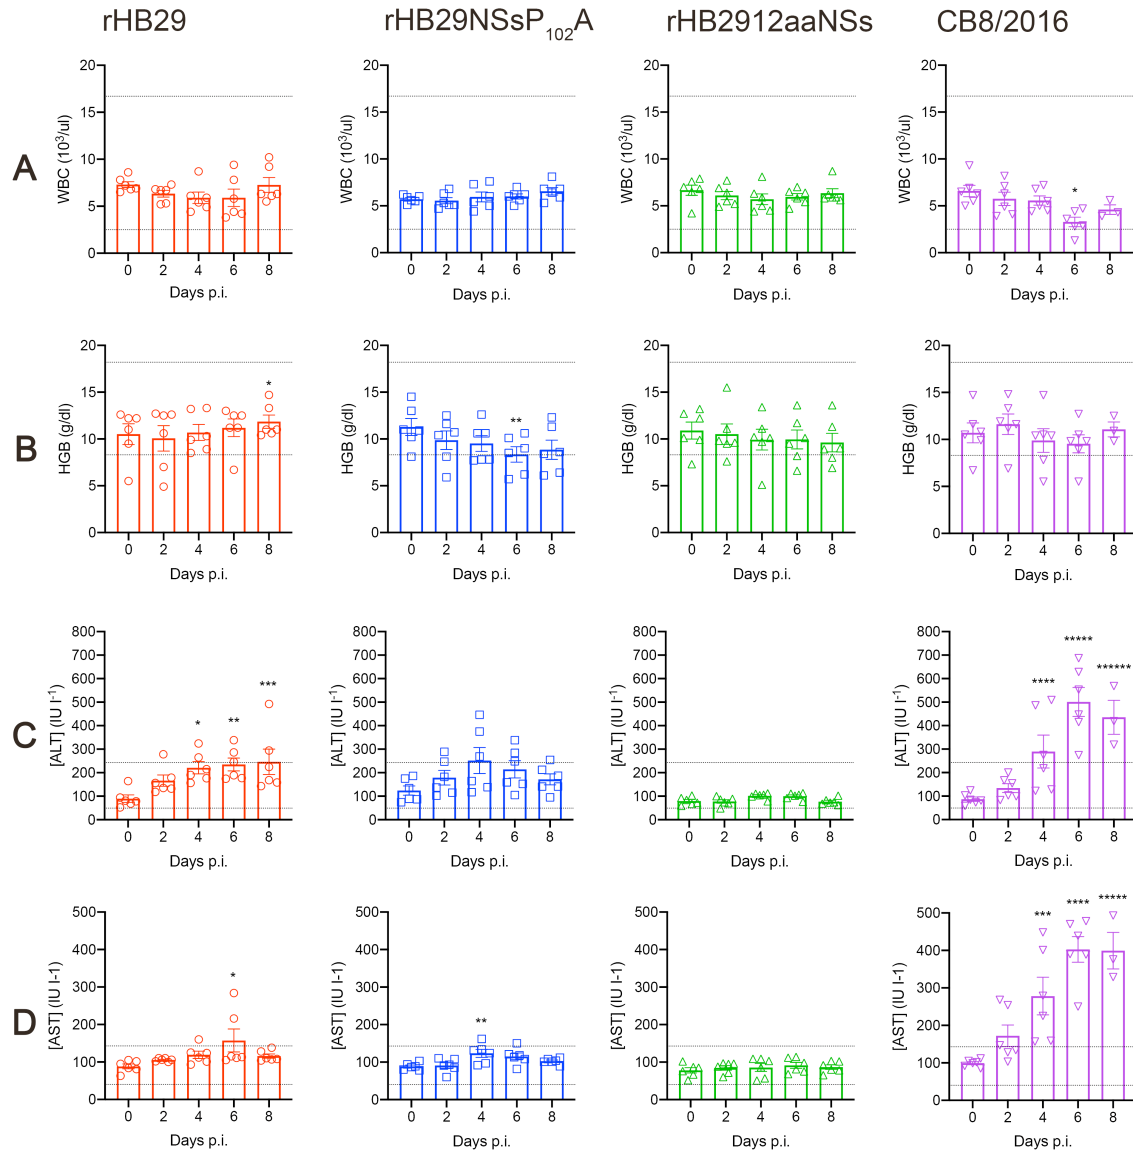

**Fig S1. Hematological analysis of aged ferrets infected with recombinant or CB8/2016 SFTS viruses.** (A-D) The aged ferrets in each group were inoculated with  $4 \times 10^6$  PFU of rHB29 (red),  $4 \times 10^6$  PFU of rHB29NSsP<sub>102</sub>A (blue),  $5 \times 10^5$  PFU of rHB2912aaNSs (green) or  $5 \times 10^5$  PFU of CB8/2016 (purple) and White blood cell, WBC (A), Haemoglobin, HGB (B), Alanine transaminase, ALT (C) and Aspartate transaminase, AST (D) were analyzed until 8 days p.i. (n=6). The mean values are shown  $\pm$  standard error the mean. The asterisks indicate significance compared to each day p.i. sample by the one-way ANOVA with Dunnett's multiple comparison test. \*P=0.0017 (A); \*P=0.0265, \*\*P=0.0129, \*\*\*P=0.007, \*\*\*\*P=0.0244, \*\*\*\*\*P<0.0001, and \*\*\*\*\*P=0.0015, (C); and \*P=0.0107, \*\*P=0.0092, \*\*\*P=0.004, \*\*\*\*P<0.0001, and \*\*\*\*\*P=0.0002 (D).

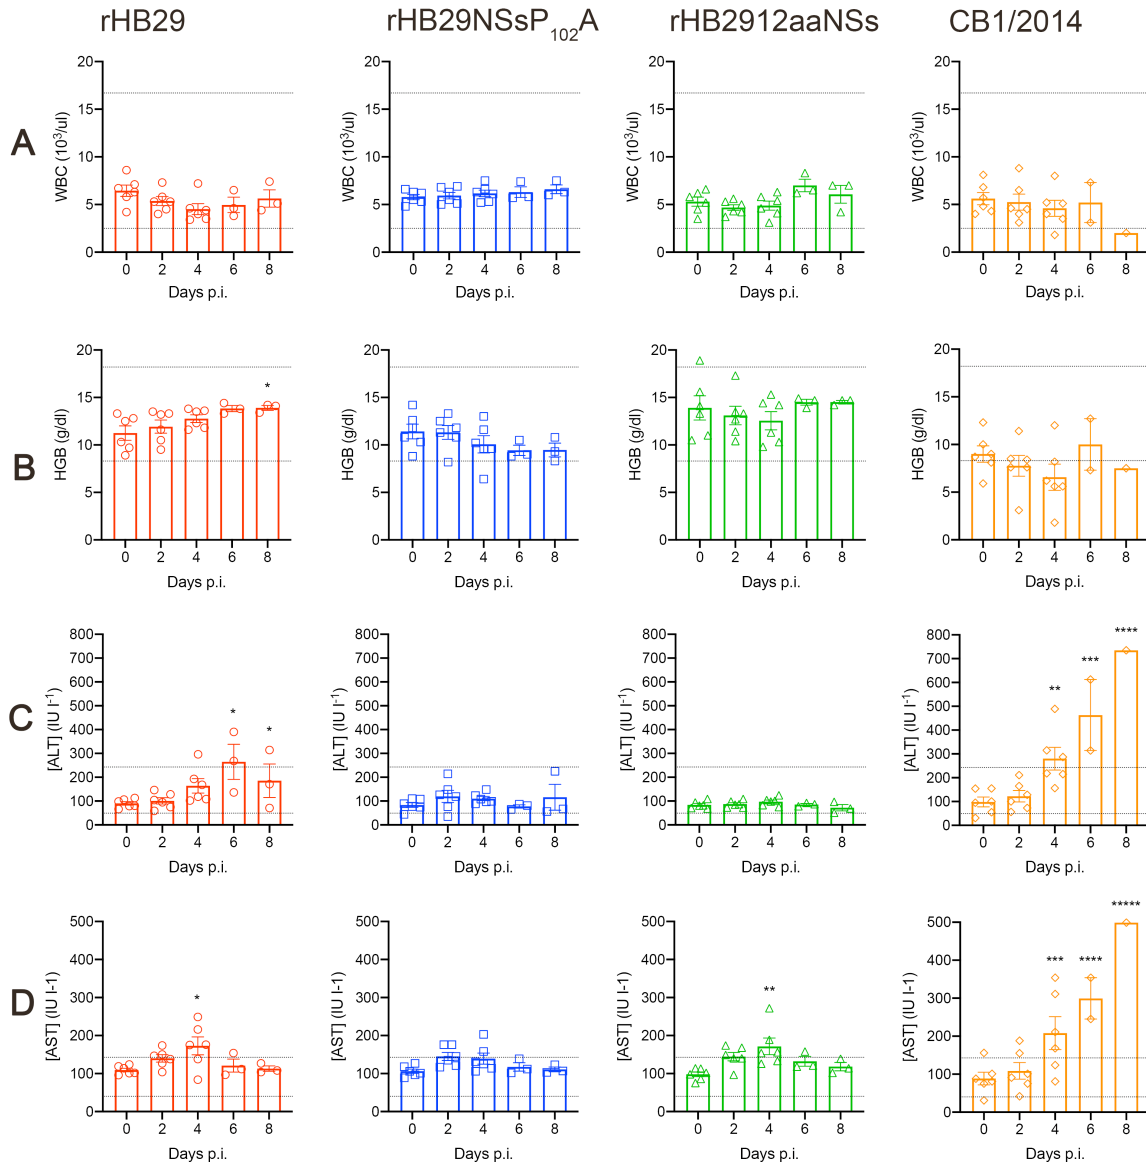

**Fig S2. Hematological analysis of aged ferrets after challenged with CB1/2014 SFTS viruses.** (A-D) Groups of ferrets vaccinated with rHB29 (red), rHB29NSsP<sub>102</sub>A (blue), rHB2912aaNSs (green), respectively were challenged with CB1/2014. PBS-immunised ferrets were also infected with CB1/2014 (orange) as a control. WBC (A), HGB (B), ALT (C) and AST (D) were analyzed until 8 days p.i. (n=6). The mean values are shown  $\pm$  standard error the mean. The asterisks indicate significance compared to each day p.i. sample by the one-way ANOVA with Dunnett's multiple comparison test. \*P = 0.0493 (B); \*P = 0.0095, \*\*P = 0.0154, \*\*\*P = 0.0009, and \*\*\*\*P < 0.0001 (C); and \*P = 0.0160, \*\*P = 0.0493, \*\*\*P = 0.0042, \*\*\*\*P = 0.0423, \*\*\*\*\*P = 0.0101, and \*\*\*\*\*P = 0.0003 (D).

**Table S1.** Identity of amino acid differences in open reading frames of SFTSV genotypes B and D. L (RNA-dependent RNA polymerase), M (M polyprotein), NSs (non-structural protein) and N (nucleocapsid protein) open reading frames.

| Gene | Position | Amino acid in |                       |                        |                       |
|------|----------|---------------|-----------------------|------------------------|-----------------------|
|      |          | Genotype D    | Genotype D            | Genotype D             | Genotype B            |
|      |          | HB29*         | CB8/2016 <sup>#</sup> | NSsP <sub>102A</sub> * | CB1/2014 <sup>†</sup> |
| L    | 2        | N             | D                     | N                      | D                     |
|      | 264      | D             | D                     | D                      | N                     |
|      | 314      | G             | G                     | G                      | S                     |
|      | 566      | F             | Y                     | F                      | Y                     |
|      | 651      | V             | I                     | V                      | I                     |
|      | 719      | N             | S                     | N                      | S                     |
|      | 795      | S             | F                     | S                      | S                     |
|      | 835      | K             | R                     | K                      | R                     |
|      | 856      | K             | K                     | K                      | R                     |
|      | 1038     | T             | S                     | T                      | S                     |
|      | 1397     | S             | N                     | S                      | N                     |
|      | 1433     | A             | T                     | A                      | A                     |
|      | 1447     | M             | M                     | M                      | T                     |
|      | 1684     | K             | R                     | K                      | R                     |
|      | 1717     | V             | V                     | V                      | I                     |
|      | 1745     | S             | S                     | S                      | N                     |
| 1903 | N        | N             | N                     | S                      |                       |
| M    | 21       | S             | S                     | S                      | T                     |
|      | 37       | G             | G                     | G                      | N                     |
|      | 114      | E             | G                     | E                      | G                     |
|      | 218      | G             | G                     | G                      | S                     |

|      |     |   |   |   |   |
|------|-----|---|---|---|---|
| 272  | K   | K | K | E |   |
| 273  | A   | A | A | T |   |
| 300  | E   | D | E | E |   |
| 321  | T   | M | T | M |   |
| 371  | R   | K | R | K |   |
| 385  | S   | T | S | T |   |
| 3944 | H   | Q | H | Q |   |
| 404  | T   | T | T | A |   |
| 457  | L   | I | L | L |   |
| 470  | T   | T | T | S |   |
| 501  | V   | M | V | M |   |
| 506  | G   | G | G | R |   |
| 525  | I   | V | I | V |   |
| 587  | P   | P | P | S |   |
| 662  | T   | T | T | A |   |
| 737  | I   | T | I | T |   |
| 960  | R   | S | R | S |   |
| 962  | D   | G | D | D |   |
| 995  | T   | T | T | S |   |
| 1011 | N   | N | N | S |   |
| 1017 | F   | S | F | S |   |
| 1058 | L   | S | L | S |   |
| 1070 | T   | T | T | S |   |
| NSs  | 102 | P | P | A | P |
|      | 130 | R | K | R | R |
|      | 197 | L | M | L | M |
|      | 207 | P | S | P | S |

|   |     |   |   |   |   |
|---|-----|---|---|---|---|
|   | 223 | V | V | V | I |
|   | 228 | T | T | T | A |
|   | 243 | V | A | V | V |
|   | 245 | H | Q | H | Q |
|   | 249 | H | H | H | Y |
|   | 278 | I | I | I | V |
|   | 281 | R | R | R | K |
|   | 291 | K | K | K | E |
| N | 51  | V | V | V | M |
|   | 52  | K | K | K | E |

---

\* based on accession numbers AJD86038 (L), AJD86039 (M), AJD86041 (NSs), AJD86040 (N).

# based on accession numbers QDF82697 (L), QDF82698 (M), QDF82699 (NSs), QDF82700 (N).

† based on accession numbers ASW22982 (L), ASW22985 (M), ASW22988 (NSs), ASW22989 (N).
